# Supplementary material for: Impact of short-term flavanol supplementation on fasting plasma trimethylamine N-oxide concentrations in obese adults
Source: Royal Society of Chemistry journal article supplement (doi:10.1039/c8fo00962g), 2018-01-01
Supplement: c8fo00962g1.xlsx [file c8fo00962g1.xlsx]

## Sheet: Sheet1
Spreadsheet: Cocoa/Tea Study
Spreadsheet
Item Name	Quantity	Measure	Wgt (g)	Cals (kcal)	FatCals (kcal)	SatCals (kcal)	Prot (g)	Carb (g)	TotFib (g)	Sugar (g)	Fat (g)	SatFat (g)	MonoFat (g)	PolyFat (g)	TransFat (g)	Chol (mg)	Sod (mg)	SugAdd (g)	Chln (mg)
Day 1 (9/6/2017)			1438.8	1919.46	566.01	177.05	82.18	259.35	16.13	112.76	62.93	19.67	10.69	8.28	0.17	232.99	1840.93	13.3	225.08
Breakfast			303.8	403.41	83.25	28.9	16.66	63.89	3.7	25.2	9.25	3.21	1.46	0.71	0.15	13.68	411.98	2.79	38.99
cereal, hearty raisin, Oatmeal Crisp	39	Gram	39	145.08	13.3	2.81	3.31	31.51	2.92	10.64	1.48	0.31	0.51	0.59	0	0	76.05	--	10.92
english muffin, honey wheat	44	Gram	44	100.35	3.47	0	3.86	20.07	0.77	2.32	0.39	0	0	0	0	0	138.95	--	--
egg, original, liquid	39	Gram	39	19.18	0	0	3.84	0.64	0	0.64	0	0	0	0	0	0	73.52	0	--
Margarine(PROMISE)- 14g= 1serving	7	Gram	7	40	36	6.75	--	--	--	--	4	0.75	--	--	--	--	42.5	--	--
Marmalade, orange, 0.5oz pkt	1	Gram	1	2.46	0	0	0	0.66	0.01	0.6	0	0	0	0	0	0	0.56	--	0.03
sugar, white, granulated	2.8	Gram	2.8	10.84	0	0	0	2.8	0	2.79	0	0	0	0	0	0	0.03	2.79	0
milk, 2%	171	Gram	171	85.5	30.47	19.35	5.64	8.21	0	8.21	3.39	2.15	0.96	0.12	0.15	13.68	80.37	0	28.04
Lunch			528	670.11	210.45	49.41	26.8	91.69	4.8	49.97	23.38	5.49	2.73	5.76	0.02	84.47	614.15	0	70.64
chicken breast, roasted, skinless	61	Gram	61	100.65	19.6	5.54	18.92	0	0	0	2.18	0.62	0.76	0.47	--	51.85	45.14	0	52.03
mayonnaise	11	Gram	11	74.8	74.1	11.59	0.11	0.06	0	0.06	8.23	1.29	1.85	4.92	0.02	4.62	69.85	0	3.76
onion, white, fresh, chopped	4	Gram	4	1.6	0.04	0.02	0.04	0.37	0.07	0.17	0	0	0	0	0	0	0.16	0	0.24
lettuce, iceberg, fresh, large head	36	Gram	36	5.04	0.45	0.06	0.32	1.07	0.4	0.66	0.05	0.01	0	0.03	0	0	3.6	0	2.41
bread, pita, whole wheat, 4"	46	Gram	46	120.52	7.08	0.61	4.51	25.71	2.81	1.32	0.79	0.07	0.11	0.34	--	0	242.42	--	12.19
drink, fruit punch, prepared from dry with water	171	Gram	171	63.27	0.15	0.09	0	16.19	0	15.78	0.02	0.01	0	0	0	0	11.97	--	--
cake, carrot, frozen, with cream cheese icing, premium, 9" round, food service	56	Gram	56	217	107.1	31.5	2.1	25.9	0.53	16.8	11.9	3.5	--	--	0	28	231	--	--
peaches, canned, in light syrup, drained	143	Gram	143	87.23	1.93	--	0.8	22.38	1	15.17	0.21	--	--	--	0	--	10.01	--	--
Dinner			607	845.94	272.31	98.74	38.72	103.77	7.62	37.58	30.3	10.97	6.5	1.81	0.01	134.84	814.8	10.51	115.44
beef roast, bottom round, cooked, lean, 1/8" trim, URMIS 1464	79	Gram	79	128.77	40.67	14.02	22.12	0	0	0	4.52	1.56	1.89	0.18	--	60.04	29.23	0	84.21
USDA: Beef Stroganoff Sauce	43	Gram	43	66.65	53.44	21.28	0.63	2.52	0	1.1	5.98	2.36	1.39	0.62	0.01	4.4	233.52	0	0
sauce mix, beef stroganoff	3.30285	Gram	3.3	9.44	0	0	0	1.89	0	0.47	0	0	0	0	0	0	226.48	--	--
oil, canola	0.157279	Tablespoon	2.2	19.46	19.46	1.46	0	0	0	0	2.2	0.16	1.39	0.62	0.01	0	0	0	0
water, tap	0.078639	Cup	18.62	0	0	0	0	0	0	0	0	0	0	0	0	0	0.74	0	0
sour cream, all natural	0.078639	Cup	18.87	37.75	33.97	19.82	0.63	0.63	0	0.63	3.77	2.2	--	--	0	4.4	6.29	0	--
Egg Noodles, cooked, ROSELI- 112g= 1 serving	86	Gram	86	168.93	20.73	6.91	6.14	30.71	0.77	1.54	2.3	0.77	--	--	--	42.23	11.52	--	--
vegetables, mixed, frozen, corn lima beans green beans peas & carrots	86	Gram	86	61.92	4.02	0.76	2.86	11.58	3.44	--	0.45	0.08	0.03	0.2	0	0	40.42	--	--
carrots, baby, fresh	21	Gram	21	7.35	0.25	0.04	0.13	1.73	0.61	1	0.03	0	0	0.01	0	0	16.38	0	1.57
lettuce, iceberg, fresh, large head	25	Gram	25	3.5	0.31	0.04	0.22	0.74	0.28	0.46	0.03	0	0	0.02	0	0	2.5	0	1.67
tomatoes, cherry, red, fresh, year round average	36	Gram	36	6.48	0.65	0.09	0.32	1.4	0.43	0.95	0.07	0.01	0.01	0.03	0	0	1.8	0	2.41
salad dressing, creamy italian	14	Gram	14	37.33	29.4	4.2	0	0.47	0	0.47	3.27	0.47	--	--	0	0	102.67	--	--
roll, dinner, wheat	41	Gram	41	111.93	23.25	5.52	3.53	18.86	1.56	0.67	2.58	0.61	1.27	0.45	--	0	214.84	--	7.67
Margarine(PROMISE)- 14g= 1serving	7	Gram	7	40	36	6.75	--	--	--	--	4	0.75	--	--	--	--	42.5	--	--
ice cream, vanilla	64	Gram	64	132.48	63.36	39.11	2.24	15.1	0.45	13.58	7.04	4.35	1.9	0.29	--	28.16	51.2	10.51	16.64
topping, caramel	19	Gram	19	41.04	0	0	0.23	10.83	0	10.83	0	0	0	0	0	0	64.79	--	1.25
juice drink, citrus fruit, prepared from concentrate	86	Gram	86	39.56	0.23	0.02	0.29	9.82	0.09	6.99	0.03	0	0	0	0	0	3.44	--	--
Day 2 (9/7/2017)			1525.4	2063.91	637.77	190.29	70.66	292.2	18.48	133.5	70.86	21.14	17.11	17.86	0.43	132.24	3231.7	12.68	119.01
Breakfast			468.4	451.23	90.81	29.18	16.36	75.7	1.56	42.2	10.09	3.24	2.63	3.8	0.23	22.81	631.54	12.68	34.11
pancakes, buttermilk, frozen	83	Gram	83	203.35	59.76	9.71	4.4	32.04	0.83	8.3	6.64	1.08	1.66	3.65	0.08	9.13	421.64	--	--
syrup, pancake	20	Gram	20	46.8	0	0	0	12.29	0	4.29	0	0	0	0	0	0	16.4	4.29	0
peaches, canned, sliced, in light syrup	43	Gram	43	23.22	0.12	0.01	0.19	6.26	0.56	5.7	0.01	0	0.01	0.01	0	0	2.15	--	1.76
milk, 2%	171	Gram	171	85.5	30.47	19.35	5.64	8.21	0	8.21	3.39	2.15	0.96	0.12	0.15	13.68	80.37	0	28.04
juice, orange, prepared from concentrate, unsweetened	86	Gram	86	31.82	0.46	0.12	0.52	7.57	0.17	6.38	0.05	0.01	0.01	0.01	0	0	3.44	0	4.3
sugar, white, granulated	8.4	Gram	8.4	32.51	0	0	0	8.4	0	8.38	0	0	0	0	0	0	0.08	8.38	0
egg, original, liquid	57	Gram	57	28.03	0	0	5.61	0.93	0	0.93	0	0	0	0	0	0	107.46	0	--
Lunch			507	836.15	298.75	90.54	26.83	111.12	8.81	43.7	33.19	10.06	8.66	11.86	0.1	36.44	1447.22	0	28.15
chili, canned, vegetarian	143	Gram	143	180.18	57.91	9.01	14.87	15.59	4.86	1.86	6.43	1	1.29	4.15	0	0	647.79	--	--
croissant, butter	50	Gram	50	203	94.5	52.47	4.1	22.9	1.3	5.63	10.5	5.83	2.76	0.55	--	33.5	233.5	--	19.4
crackers, original, Club	36	Gram	36	174.96	71.6	11.66	1.98	23.83	0.68	3.2	7.96	1.3	1.94	4.64	0.08	0	327.24	--	--
potato chips, bbq	20	Gram	20	97.4	55.91	7.2	1.3	11.18	0.76	1.09	6.21	0.8	2.64	2.44	0.02	0	109	--	2.3
pineapple, canned, chunks, in heavy syrup	129	Gram	129	100.62	1.28	0.1	0.45	26.06	1.03	21.8	0.14	0.01	0.02	0.05	0	0	1.29	--	4.9
cottage cheese, small curd, 4%	43	Gram	43	40.43	16.54	9.92	4.04	1.84	0	1.84	1.84	1.1	--	--	--	2.94	124.96	0	--
juice, apple, unsweetened	86	Gram	86	39.56	1.01	0.17	0.09	9.72	0.17	8.27	0.11	0.02	0.01	0.03	0	0	3.44	0	1.55
Dinner			550	776.53	248.21	70.56	27.47	105.38	8.11	47.61	27.58	7.84	5.81	2.2	0.1	72.99	1152.94	0	56.75
casserole, tuna noodle, frozen, classics	114	Gram	114	150.79	60.32	18.1	7.37	15.08	1.01	1.01	6.7	2.01	--	--	0	23.46	331.75	--	--
tuna, light, canned, in water, drained, 12.5 oz can	43	Gram	43	36.98	3.72	0.82	8.36	0	0	0	0.41	0.09	0.05	0.12	0	15.48	106.21	0	12.6
peas & carrots, frozen	57	Gram	57	30.21	2.41	0.43	1.94	6.36	1.94	--	0.27	0.05	0.02	0.13	0	0	45.03	--	--
cornbread, prepared from dry mix	46	Gram	46	151.8	39.66	15.45	3.03	25.05	1.06	7.38	4.41	1.72	1.61	0.9	0.1	26.22	275.54	--	27
Margarine(PROMISE)- 14g= 1serving	7	Gram	7	40	36	6.75	--	--	--	--	4	0.75	--	--	--	--	42.5	--	--
lettuce, iceberg, fresh, large head	29	Gram	29	4.06	0.37	0.05	0.26	0.86	0.33	0.54	0.04	0.01	0	0.02	0	0	2.9	0	1.94
spinach, baby, fresh	23	Gram	23	5.41	0	0	0.54	0.81	0.54	0	0	0	0	0	0	0	17.59	0	--
carrots, baby, fresh	39	Gram	39	13.65	0.46	0.08	0.25	3.21	1.13	1.86	0.05	0.01	0	0.03	0	0	30.42	0	2.92
cucumber, fresh, with skin, 8 1/4"	26	Gram	26	3.9	0.26	0.09	0.17	0.94	0.13	0.43	0.03	0.01	0	0.01	0	0	0.52	0	1.56
egg white, cooked	25	Gram	25	12.5	0	0	2.63	0.26	0	--	0	0	0	0	0	0	41	--	--
salad dressing, creamy italian	14	Gram	14	37.33	29.4	4.2	0	0.47	0	0.47	3.27	0.47	--	--	0	0	102.67	--	--
sherbet, orange	86	Gram	86	123.84	15.48	8.98	0.95	26.14	1.12	20.92	1.72	1	0.46	0.07	--	0.86	39.56	--	6.62
brownie, large square 2 3/4" x 7/8"	41	Gram	41	166.05	60.15	15.63	1.97	26.2	0.86	15.01	6.68	1.74	3.68	0.93	--	6.97	117.26	--	4.1
Day 3 (9/8/2017)			1884.8	2047.35	589.84	187.22	80.02	290.49	23.59	148.27	65.54	20.8	12.17	13.68	0.83	166.5	2848.53	7.09	185.53
Breakfast			455.8	535.09	126.26	41.86	12.69	93.31	4.32	48.28	14.03	4.65	2.58	2.68	0.23	33.84	706.7	7.09	42
cereal, Raisin Bran	28	Gram	28	89.04	6.85	1.21	2.16	21.64	3.19	8.76	0.76	0.13	0.09	0.27	0	0	99.68	--	6.8
french toast sticks, toaster, cinnamon, frozen	84	Gram	84	210	52.16	14.36	4.03	35.78	0.84	13.61	5.8	1.6	1.51	2.27	0.08	20.16	462	--	--
Margarine(PROMISE)- 14g= 1serving	7	Gram	7	40	36	6.75	--	--	--	--	4	0.75	--	--	--	--	42.5	--	--
syrup, pancake	20	Gram	20	46.8	0	0	0	12.29	0	4.29	0	0	0	0	0	0	16.4	4.29	0
juice, orange, prepared from concentrate, unsweetened	143	Gram	143	52.91	0.77	0.19	0.86	12.58	0.29	10.61	0.09	0.02	0.02	0.02	0	0	5.72	0	7.15
sugar, white, granulated	2.8	Gram	2.8	10.84	0	0	0	2.8	0	2.79	0	0	0	0	0	0	0.03	2.79	0
milk, 2%	171	Gram	171	85.5	30.47	19.35	5.64	8.21	0	8.21	3.39	2.15	0.96	0.12	0.15	13.68	80.37	0	28.04
Lunch			768	911.16	352.92	125.75	35.39	106.39	6.61	72.85	39.21	13.97	7.31	7.29	0.57	79.56	1204.16	0	79.34
turkey light meat, smoked, skinless, medium slice, 3"x2"x1/4"	32	Gram	32	54.4	14.4	4.75	9.38	0	0	0	1.6	0.53	0.33	0.46	--	24.32	318.72	0	26.34
cheese, swiss	48	Gram	48	188.64	133.88	78.74	12.94	0.69	0	0	14.88	8.75	3.86	0.64	0.47	44.64	89.76	0	7.44
lettuce, iceberg, fresh, large head	36	Gram	36	5.04	0.45	0.06	0.32	1.07	0.4	0.66	0.05	0.01	0	0.03	0	0	3.6	0	2.41
celery, fresh, 4" strips	21	Gram	21	3.36	0.32	0.08	0.14	0.62	0.34	0.28	0.04	0.01	0.01	0.02	0	0	16.8	0	1.28
salad dressing, buttermilk ranch	25	Gram	25	100	90	15	0	0.83	0	0.83	10	1.67	--	--	0	2.5	241.67	--	--
crackers, original, Club	46	Gram	46	223.56	91.49	14.9	2.53	30.45	0.87	4.09	10.17	1.66	2.48	5.93	0.1	0	418.14	--	--
yogurt, vanilla, 11g protein, lowfat	162	Gram	162	137.7	18.22	11.75	7.99	22.36	0	22.36	2.02	1.31	0.56	0.06	--	8.1	106.92	--	24.62
blueberries, canned, in heavy syrup	57	Gram	57	50.16	1.69	0.14	0.37	12.57	0.91	11.66	0.19	0.02	0.03	0.08	0	0	1.71	--	2.28
orange, fresh, medium, 2 5/8"	170	Gram	170	79.9	1.84	0.23	1.6	19.98	4.08	15.89	0.2	0.03	0.04	0.04	0	0	0	0	14.28
lemonade, white, prepared from frozen concentrate	171	Gram	171	68.4	0.62	0.09	0.12	17.82	0	17.07	0.07	0.01	0	0.02	0	0	6.84	--	0.68
Dinner			661	601.1	110.66	19.61	31.93	90.79	12.67	27.13	12.3	2.18	2.28	3.71	0.02	53.1	937.68	0	64.19
chicken breast, roasted, skinless	61	Gram	61	100.65	19.6	5.54	18.92	0	0	0	2.18	0.62	0.76	0.47	--	51.85	45.14	0	52.03
gravy, chicken, canned	25	Gram	25	12	5.89	1.44	0.18	1.32	0.02	0.07	0.65	0.16	0.26	0.1	0	1.25	97.25	--	0.92
vegetables, mixed, frozen, corn lima beans green beans peas & carrots	143	Gram	143	102.96	6.69	1.26	4.76	19.26	5.72	--	0.74	0.14	0.04	0.34	0	0	67.21	--	--
rice & red beans, arroz con habichuelas colorades	171	Gram	171	242.82	53.25	7.73	6.77	40.6	4.45	0.26	5.92	0.86	1.18	2.7	0.02	--	632.7	--	--
lettuce, iceberg, fresh, large head	21	Gram	21	2.94	0.26	0.03	0.19	0.62	0.24	0.39	0.03	0	0	0.02	0	0	2.1	0	1.41
tomatoes, fresh, year round average, sliced	29	Gram	29	5.22	0.52	0.07	0.26	1.13	0.35	0.76	0.06	0.01	0.01	0.02	0	0	1.45	0	1.94
cucumber, fresh, with skin, 8 1/4"	21	Gram	21	3.15	0.21	0.07	0.14	0.76	0.1	0.35	0.02	0.01	0	0.01	0	0	0.42	0	1.26
salad dressing, creamy italian	11	Gram	11	29.33	23.1	3.3	0	0.37	0	0.37	2.57	0.37	--	--	0	0	80.67	--	--
fruit cocktail, canned, in light syrup	179	Gram	179	102.03	1.13	0.16	0.72	26.72	1.79	24.93	0.13	0.02	0.03	0.06	0	0	10.74	--	6.62
Day 4 (9/9/2017)			1527.8	1904.06	650.27	262.36	56.87	261.19	17.22	121.09	72.25	29.15	15.04	11.17	0.29	191.89	2745.96	7.3	71.54
Breakfast			335.8	348.37	100.3	31.17	9.39	52.97	1.27	24.35	11.14	3.46	3.53	1.22	0.15	20.68	450.42	7.3	32.34
waffles, plain, frozen, 4"	50	Gram	50	142.5	43.65	6.89	3.23	21.49	1.1	2.45	4.85	0.77	2.56	1.08	--	7	319	--	--
syrup, pancake	21	Gram	21	49.14	0	0	0	12.91	0	4.51	0	0	0	0	0	0	17.22	4.51	0
Margarine(PROMISE)- 14g= 1serving	5	Gram	5	28.57	25.71	4.82	--	--	--	--	2.86	0.54	--	--	--	--	30.36	--	--
sugar, white, granulated	2.8	Gram	2.8	10.84	0	0	0	2.8	0	2.79	0	0	0	0	0	0	0.03	2.79	0
milk, 2%	171	Gram	171	85.5	30.47	19.35	5.64	8.21	0	8.21	3.39	2.15	0.96	0.12	0.15	13.68	80.37	0	28.04
juice, orange, prepared from concentrate, unsweetened	86	Gram	86	31.82	0.46	0.12	0.52	7.57	0.17	6.38	0.05	0.01	0.01	0.01	0	0	3.44	0	4.3
Lunch			578	918.89	362.61	169.3	27.95	113.51	6.59	50.93	40.29	18.81	6	7.85	0.04	84.11	1526.76	--	6.96
Brookwood: Pit-Cooked Beef BBQ w/ Sauce- 100g= 1 svg	129	Gram	129	323.79	197.37	139.32	19.35	11.61	2.58	9.03	21.93	15.48	--	--	--	64.5	864.3	--	--
bun, hamburger	43	Gram	43	119.97	15.13	3.26	4.2	21.55	0.77	3.13	1.68	0.36	0.32	0.77	0.01	0	212.42	--	6.28
coleslaw	86	Gram	86	131.58	76.7	12.38	0.82	12.81	1.63	10.48	8.52	1.38	2.3	4.6	0.03	3.44	174.58	--	--
cookie, oatmeal raisin, prepared from recipe, 2 5/8"	49	Gram	49	213.15	71.44	14.25	3.19	33.52	--	--	7.94	1.58	3.38	2.47	--	16.17	263.62	--	--
pears, canned, in light syrup, drained	100	Gram	100	62	1.35	--	0.28	16.21	1.6	11.22	0.15	--	--	--	0	--	5	--	--
lemonade, white, prepared from frozen concentrate	171	Gram	171	68.4	0.62	0.09	0.12	17.82	0	17.07	0.07	0.01	0	0.02	0	0	6.84	--	0.68
Dinner			614	636.8	187.36	61.89	19.52	94.71	9.36	45.82	20.82	6.88	5.51	2.1	0.1	87.1	768.78	0	32.23
Roseli: Cheese Ravioli	93	Gram	93	173.96	54.19	27.1	8.7	22.75	1.34	2.01	6.02	3.01	--	--	--	53.53	200.72	--	--
pasta sauce, mushroom	86	Gram	86	61.92	18.58	3.1	1.38	8.94	2.75	6.19	2.06	0.34	--	--	0	0	323.36	--	--
vegetables, oriental blend, frozen, food service	143	Gram	143	42.06	0	0	1.68	8.41	3.36	3.36	0	0	0	0	0	0	8.41	0	--
lettuce, iceberg, fresh, large head	19	Gram	19	2.66	0.24	0.03	0.17	0.56	0.21	0.35	0.03	0	0	0.01	0	0	1.9	0	1.27
spinach, baby, fresh	11	Gram	11	2.59	0	0	0.26	0.39	0.26	0	0	0	0	0	0	0	8.41	0	--
cucumber, fresh, with skin, 8 1/4"	26	Gram	26	3.9	0.26	0.09	0.17	0.94	0.13	0.43	0.03	0.01	0	0.01	0	0	0.52	0	1.56
cheese, cheddar, shredded	11	Gram	11	44.44	32.98	18.68	2.52	0.34	0	0.05	3.66	2.08	1.02	0.16	0.1	10.89	71.83	0	1.81
pie, pecan	54	Gram	54	219.78	81.11	12.9	2.43	32.19	1.13	13.6	9.01	1.43	4.49	1.92	--	22.68	148.5	--	26.73
juice drink, pineapple orange, canned	171	Gram	171	85.5	0	0	2.22	20.18	0.17	19.82	0	0	0	0	0	0	5.13	--	0.85
Day 5 (9/10/2017)			1848.8	2036.27	689.15	193.17	73.48	264.2	18.51	134.82	76.57	21.46	21.55	16.3	2.72	141.51	3752.12	2.79	188.91
Breakfast			473.8	471.76	119.42	34.38	14.82	72.35	3.1	42.56	13.27	3.82	2.67	2.8	0.15	34.74	576.93	2.79	73
muffin, corn	81	Gram	81	247.05	61.24	9.87	4.78	41.31	2.75	14.4	6.8	1.1	1.7	2.6	--	21.06	378.27	--	41.88
egg, original, liquid	43	Gram	43	21.15	0	0	4.23	0.7	0	0.7	0	0	0	0	0	0	81.07	0	--
Margarine(PROMISE)- 14g= 1serving	5	Gram	5	28.57	25.71	4.82	--	--	--	--	2.86	0.54	--	--	--	--	30.36	--	--
sugar, white, granulated	2.8	Gram	2.8	10.84	0	0	0	2.8	0	2.79	0	0	0	0	0	0	0.03	2.79	0
milk, 2%	171	Gram	171	85.5	30.47	19.35	5.64	8.21	0	8.21	3.39	2.15	0.96	0.12	0.15	13.68	80.37	0	28.04
juice, apple, unsweetened	171	Gram	171	78.66	2	0.34	0.17	19.32	0.34	16.45	0.22	0.04	0.01	0.07	0	0	6.84	0	3.08
Lunch			662	740.4	275.14	92.94	25.62	91.53	7.93	40.13	30.57	10.33	8.65	6.47	0.76	58.55	1443.22	0	31.33
cheese, swiss	20	Gram	20	78.6	55.78	32.81	5.39	0.29	0	0	6.2	3.65	1.61	0.27	0.2	18.6	37.4	0	3.1
bologna, beef	40	Gram	40	119.6	94.07	37.75	4.36	1.72	0	0.82	10.45	4.19	4.88	0.47	0.55	22.8	405.2	--	11.88
lettuce, romaine, fresh, outer leaf	20	Gram	20	3.4	0.54	0.07	0.25	0.66	0.42	0.24	0.06	0.01	0	0.03	0	0	1.6	0	1.98
mayonnaise	10	Gram	10	68	67.37	10.53	0.1	0.06	0	0.06	7.49	1.17	1.68	4.47	0.02	4.2	63.5	0	3.42
soup, chicken noodle, canned	259	Gram	259	106.19	14.69	9.32	9.56	13.47	2.07	1.48	1.63	1.04	0	0.47	0	12.95	505.05	--	--
roll, hard, 3 1/2"	41	Gram	41	120.13	15.87	2.24	4.06	21.61	0.94	0.73	1.76	0.25	0.46	0.7	--	0	223.04	--	5.99
carrots, baby, fresh	57	Gram	57	19.95	0.67	0.12	0.36	4.7	1.65	2.71	0.07	0.01	0	0.04	0	0	44.46	0	4.28
cookie, fig, Newtons	44	Gram	44	156.13	25.55	0	1.42	31.23	2.84	17.03	2.84	0	0	0	0	0	156.13	--	--
lemonade, white, prepared from frozen concentrate	171	Gram	171	68.4	0.62	0.09	0.12	17.82	0	17.07	0.07	0.01	0	0.02	0	0	6.84	--	0.68
Dinner			667	594.11	196.01	41.22	30.85	69.66	6.39	43.37	21.78	4.58	8.04	6.48	1.26	48.22	1491.02	0	84.59
turkey light meat, smoked, skinless, medium slice, 3"x2"x1/4"	61	Gram	61	103.7	27.45	9.06	17.87	0	0	0	3.05	1.01	0.63	0.88	--	46.36	607.56	0	50.2
gravy, turkey, canned	43	Gram	43	21.93	8.13	2.4	1.12	2.19	0.17	0.09	0.9	0.27	0.39	0.21	--	0.86	248.11	--	1.25
stuffing, bread, prepared from dry mix	61	Gram	61	118.95	66.15	12.73	1.67	11.49	0.49	1.24	7.35	1.41	3.52	2.17	1.26	0	292.19	--	3.23
green beans, boiled, from frozen, drained	107	Gram	107	29.96	1.64	0.42	1.59	6.9	3.21	2.01	0.18	0.05	0.01	0.09	0	0	1.07	0	14.45
lettuce, romaine, fresh, outer leaf	30	Gram	30	5.1	0.81	0.11	0.37	0.99	0.63	0.36	0.09	0.01	0	0.05	0	0	2.4	0	2.97
tomatoes, cherry, red, fresh, year round average	61	Gram	61	10.98	1.1	0.15	0.54	2.37	0.73	1.6	0.12	0.02	0.02	0.05	0	0	3.05	0	4.09
cucumber, fresh, with skin, 8 1/4"	26	Gram	26	3.9	0.26	0.09	0.17	0.94	0.13	0.43	0.03	0.01	0	0.01	0	0	0.52	0	1.56
egg white, cooked	47	Gram	47	23.5	0	0	4.94	0.48	0	--	0	0	0	0	0	0	77.08	--	--
salad dressing, french	14	Gram	14	63.98	56.46	7.12	0.11	2.18	0	2.18	6.27	0.79	1.18	2.94	--	0	117.04	--	0.64
Mandarine Oranges- Dole- 114g= 1serving	117	Gram	117	82.11	0	--	1.03	19.5	1.03	18.47	0	--	--	--	--	--	--	--	--
pudding, vanilla, canned, 3.5 oz	100	Gram	100	130	34.02	9.14	1.45	22.6	0	16.97	3.78	1.02	2.29	0.09	--	1	142	--	6.2
Evening Snack			46	230	98.57	24.64	2.19	30.67	1.1	8.76	10.95	2.74	2.19	0.55	0.55	0	240.95	--	--
cookie, shortbread, Lorna Doone	46	Gram	46	230	98.57	24.64	2.19	30.67	1.1	8.76	10.95	2.74	2.19	0.55	0.55	0	240.95	--	--
Average			1645.12	1994.21	626.61	202.02	72.64	273.49	18.79	130.09	69.63	22.45	15.31	13.46	0.89	173.02	2883.85	8.63	158.01
